# Supplementary material for: Anomalous diffusion of E. coli under microfluidic confinement and chemical gradient
Source: Royal Society of Chemistry journal article supplement (doi:10.1039/d3sm00286a), 2023-01-01
Supplement: d3sm00286a1.pdf [file d3sm00286a1.pdf]

Anomalous diffusion of *E. coli* under microfluidic confinement and  
chemical gradient

Supplementary Information

Md Ramiz Raza,<sup>1</sup> Jijo Easo George,<sup>1</sup> Savita Kumari,<sup>1</sup> Mithun K. Mitra,<sup>2,\*</sup> and Debjani Paul<sup>1,†</sup>

<sup>1</sup>*Department of Biosciences and Bioengineering,  
Indian Institute of Technology Bombay, Powai, Mumbai, 400076, India*

<sup>2</sup>*Department of Physics, Indian Institute of Technology Bombay, Powai, Mumbai, 400076, India*

---

\* [mithun@phy.iitb.ac.in](mailto:mithun@phy.iitb.ac.in)

† [debjani.paul@iitb.ac.in](mailto:debjani.paul@iitb.ac.in)

## FIGURES

1. Figure *S1* : Intensity profiles across the full device. (A-B) Fluorescent intensity is very high at both the right hand (saturated,  $\sim 255$ ) and left hand (saturated for 10  $\mu\text{m}$ , and  $\sim 80$  for 50  $\mu\text{m}$ ) feeding channels even at the start of our readings ( $t=0$ ). Inset shows a characterized length scale profile after excluding an initial distance of 125  $\mu\text{m}$  and 50  $\mu\text{m}$  in the 50  $\mu\text{m}$  wide and 10  $\mu\text{m}$  wide motility observation channel, respectively.
2. Figure *S2* : (A) The percentage of cell centroid positions lying within a 3  $\mu\text{m}$  crawling region from the walls in 50  $\mu\text{m}$  and 10  $\mu\text{m}$  wide channels. We plot the percentage of cell positions obtained in absence and presence of glucose along with the random distribution of positions in each channel. (B-E) Normalised bacterial cell positions after ignoring 100  $\mu\text{m}$  distance from the point of entry. Note that bacteria enter the channel at random positions along the width (x-axis) and with randomised velocity directions. Due to surface-induced attraction, the bacteria then require a finite time to reach the wall. Ignoring an initial transient of 100  $\mu\text{m}$  allows us to characterise the cell positions corresponding to the steady swimming behaviour. Vertical red dashed lines indicate the mean ( $\mu$ ). The error in the mean is the standard deviation. M indicates the median cell position.
3. Figure *S3* : Distribution of run length times (A - D) and residence times (E - H) in 50  $\mu\text{m}$  and 10  $\mu\text{m}$  wide channels in *absence* and *presence* of the chemoattractant glucose. Red dashed lines in the plots indicate mean values ( $\mu \pm \text{SD}$ ). N indicates the number of trajectories analyzed..
4. Figure *S4* : (A - C) Different threshold angles are explored to define the threshold for “tumbling”. (D - F) Distribution of tumbling frequencies depends on the choice of the threshold angle. (G - I) Rose plots showing the distribution of tumbling angles also depend on the choice of the threshold angle

## MOVIES

1. Movie *M1* : Motion of *E.coli* in the feeding channel.
2. Movie *M2* : Motion of *E. coli* in 50  $\mu\text{m}$  wide channel in *absence* of chemoattractant.
3. Movie *M3* : Motion of *E. coli* in 50  $\mu\text{m}$  wide channel in *presence* of chemoattractant.
4. Movie *M4* : Motion of *E.coli* in 10  $\mu\text{m}$  wide channel in *absence* of chemoattractant.
5. Movie *M5* : Motion of *E.coli* in 10  $\mu\text{m}$  wide channel in *presence* of chemoattractant.

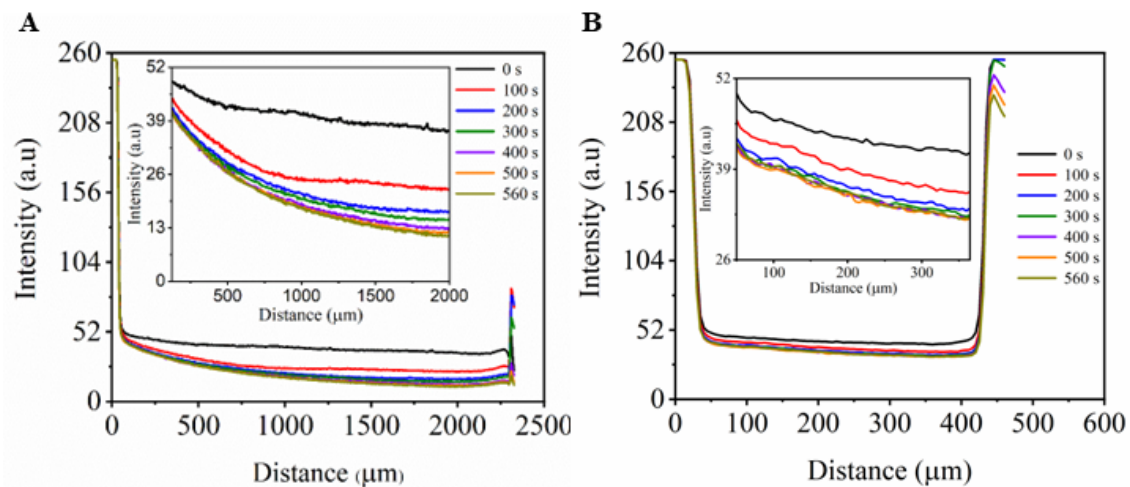

Figure S1: Intensity profiles across the full device. (A-B) Fluorescent intensity is very high at both the right hand (saturated,  $\sim 255$ ) and left hand (saturated for  $10 \mu\text{m}$ , and  $\sim 80$  for  $50 \mu\text{m}$ ) feeding channels even at the start of our readings ( $t=0$ ). Inset shows a characterized length scale profile after excluding an initial distance of  $125 \mu\text{m}$  and  $50 \mu\text{m}$  in the  $50 \mu\text{m}$  wide and  $10 \mu\text{m}$  wide motility observation channel, respectively.

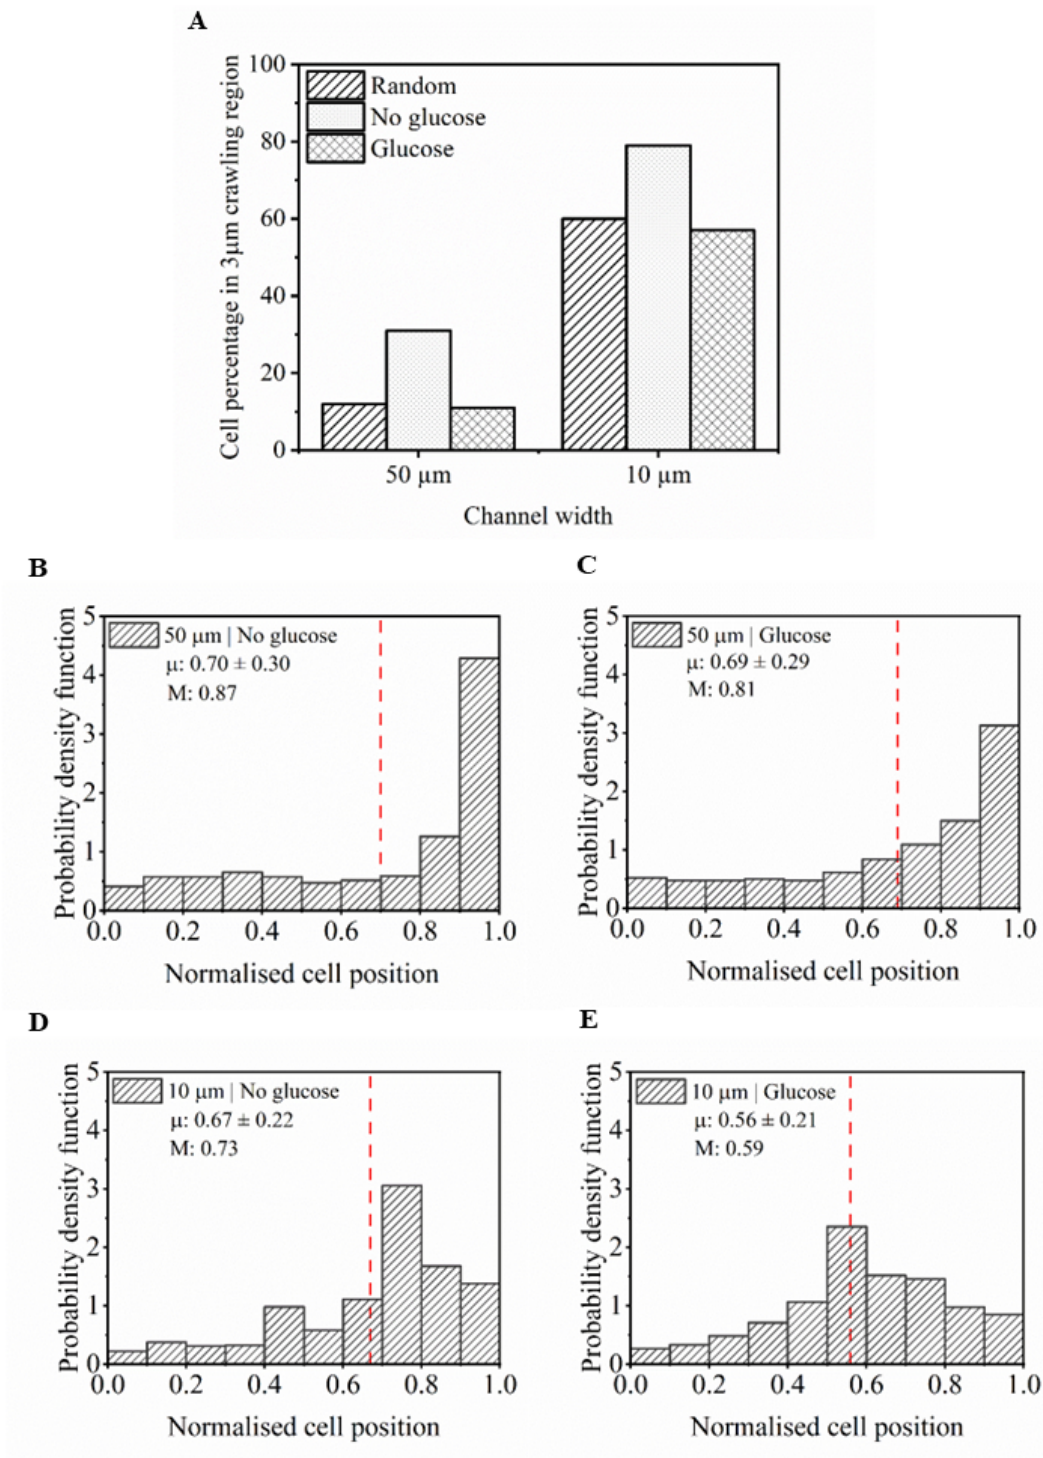

Figure S2: (A) The percentage of cell centroid positions lying within a 3  $\mu\text{m}$  crawling region from the walls in 50  $\mu\text{m}$  and 10  $\mu\text{m}$  wide channels. We plot the percentage of cell positions obtained in absence and presence of glucose along with the random distribution of positions in each channel. (B-E) Normalised bacterial cell positions after ignoring 100  $\mu\text{m}$  distance from the point of entry.

Note that bacteria enter the channel at random positions along the width (x-axis) and with randomised velocity directions. Due to surface-induced attraction, the bacteria then require a finite time to reach the wall. Ignoring an initial transient of 100  $\mu\text{m}$  allows us to characterise the cell positions corresponding to the steady swimming behaviour. Vertical red dashed lines indicate the mean ( $\mu$ ). The error in the mean is the standard deviation. M indicates the median cell position.

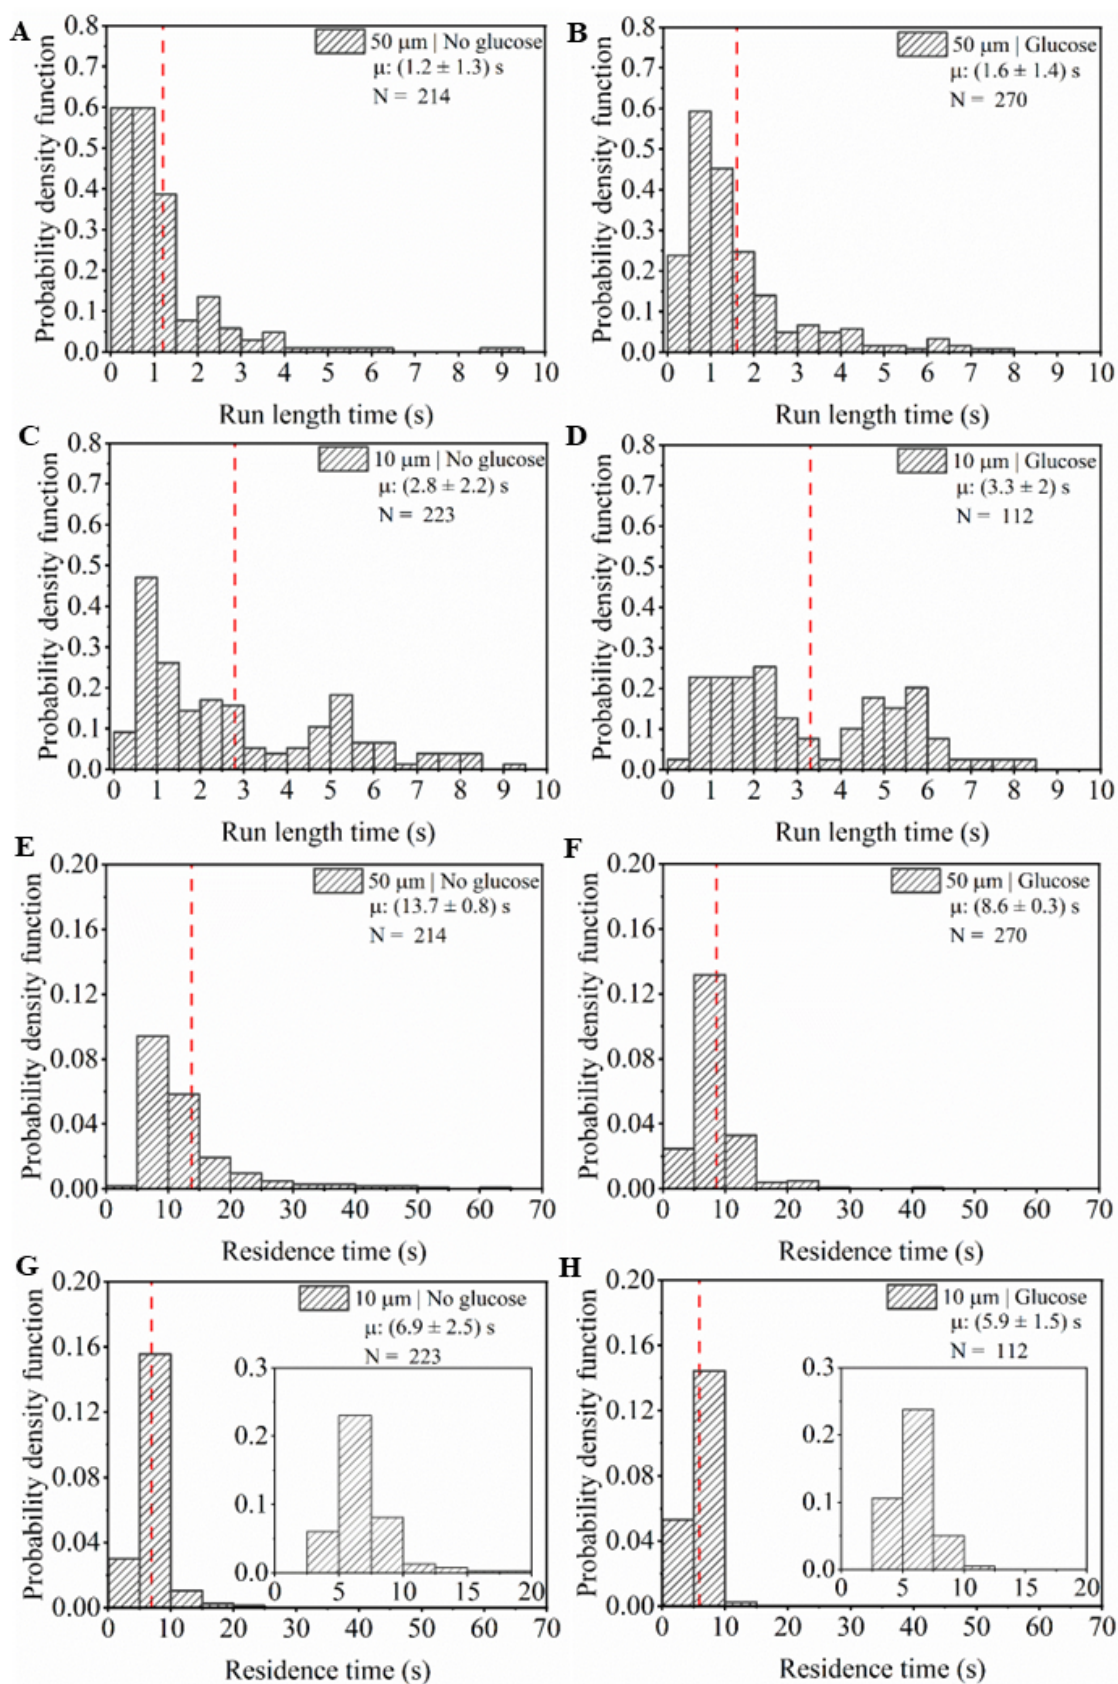

Figure S3: Distribution of run length times (A - D) and residence times (E - H) in 50  $\mu\text{m}$  and 10  $\mu\text{m}$  wide channels in *absence* and *presence* of the chemoattractant glucose. Red dashed lines in the plots indicate mean values ( $\mu \pm \text{SD}$ ).  $N$  indicates the number of trajectories analyzed.

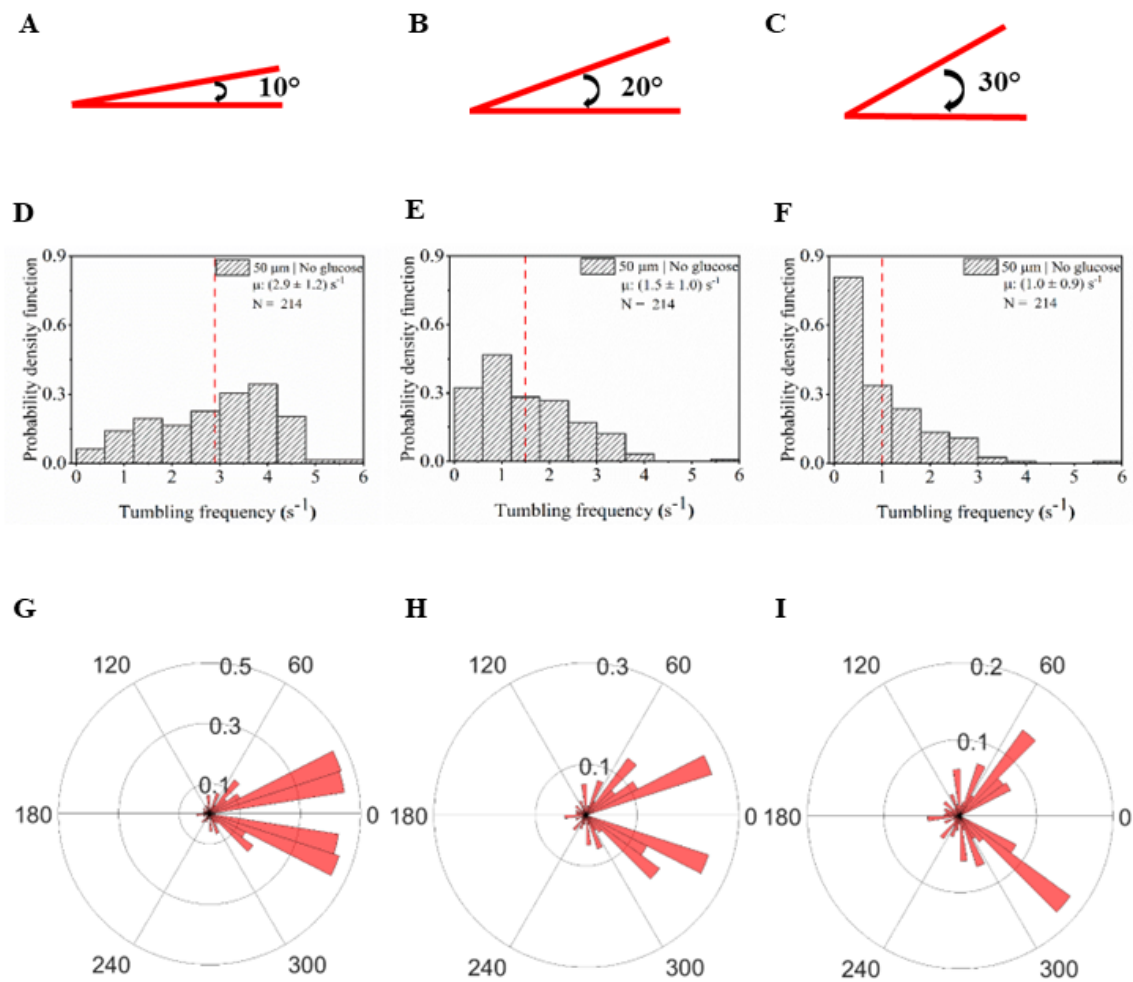

Figure S4: (A - C) Different threshold angles are explored to define the threshold for “tumbling”. (D - F) Distribution of tumbling frequencies depends on the choice of the threshold angle. (G - I) Rose plots showing the distribution of tumbling angles also depend on the choice of the threshold angle.
